# Supplementary material for: The barriers and facilitators to smoking cessation experienced by women’s partners during pregnancy and the post-partum period: a systematic review of qualitative research
Source: PubMed Central journal article supplement (PMC4558795; doi:10.1186/s12889-015-2163-x), 2015-09-03
Supplement: 12889_2015_2163_MOESM1_ESM.pdf [file 12889_2015_2163_MOESM1_ESM.pdf]

**Additional File 1: Search strategy for “The barriers and facilitators to smoking cessation experienced by women’s partners during pregnancy and the post-partum period: a systematic review of qualitative research”**

**PsycINFO**

Searched via EBSCO interface, 09.01.14

Limiters - Published Date: 19900101-20140131; English

| #   | Query                                                                                                                                                                                                                                                                                                                                 |
|-----|---------------------------------------------------------------------------------------------------------------------------------------------------------------------------------------------------------------------------------------------------------------------------------------------------------------------------------------|
| S72 | S71                                                                                                                                                                                                                                                                                                                                   |
| S71 | S4 AND S10 AND S22 AND S70                                                                                                                                                                                                                                                                                                            |
| S70 | S23 OR S24 OR S25 OR S26 OR S27 OR S28 OR S29 OR S30 OR S31 OR S32 OR S33 OR S34 OR S35 OR S36 OR S37 OR S38 OR S39 OR S40 OR S41 OR S42 OR S43 OR S44 OR S45 OR S46 OR S47 OR S48 OR S49 OR S50 OR S51 OR S52 OR S53 OR S54 OR S55 OR S56 OR S57 OR S58 OR S59 OR S60 OR S61 OR S62 OR S63 OR S64 OR S65 OR S66 OR S67 OR S68 OR S69 |
| S69 | (TI (acquaintance*) OR AB (acquaintance*))                                                                                                                                                                                                                                                                                            |
| S68 | (TI (friend*) OR AB (friend*))                                                                                                                                                                                                                                                                                                        |
| S67 | DE "Friendship"                                                                                                                                                                                                                                                                                                                       |
| S66 | (TI (visitor*) OR AB (visitor*))                                                                                                                                                                                                                                                                                                      |
| S65 | (TI (guest*) OR AB (guest*))                                                                                                                                                                                                                                                                                                          |
| S64 | (TI (flatmate* OR flat-mate* OR co-renter* OR corenter*OR roommate OR roommates OR room-mate OR room-mates OR lodger* OR tenant* OR landlord* OR land-lord*) OR AB (flatmate* OR flat-mate* OR co-renter* OR corenter*OR roommate* OR room-mate* OR lodger* OR tenant* OR landlord* OR land-lord*))                                   |
| S63 | DE "Roommates"                                                                                                                                                                                                                                                                                                                        |
| S62 | (TI ((flat* OR apartment* OR room OR rooms OR house* OR home* OR accommodation) N1 shar*) OR AB ((flat* OR apartment* OR room OR rooms OR house* OR home* OR accommodation) N1 shar*))                                                                                                                                                |
| S61 | (TI (cohabit* OR co-habit*) OR AB (cohabit* OR co-habit*))                                                                                                                                                                                                                                                                            |
| S60 | DE "Cohabitation"                                                                                                                                                                                                                                                                                                                     |
| S59 | (TI (household*) OR AB (household*))                                                                                                                                                                                                                                                                                                  |
| S58 | DE "Home Environment"                                                                                                                                                                                                                                                                                                                 |
| S57 | DE "Living Arrangements"                                                                                                                                                                                                                                                                                                              |
| S56 | DE "Housing"                                                                                                                                                                                                                                                                                                                          |
| S55 | (TI (relative#) OR AB (relative#))                                                                                                                                                                                                                                                                                                    |
| S54 | (TI (child OR children*) OR AB (child OR children*))                                                                                                                                                                                                                                                                                  |
| S53 | (TI (son OR sons OR daughter*) OR AB (son OR sons OR daughter*))                                                                                                                                                                                                                                                                      |
| S52 | (DE "Family Members" OR DE "Adopted Children" OR DE "Adult Offspring" OR DE "Ancestors" OR DE "Biological Family" OR DE "Cousins" OR DE "Daughters" OR DE "Foster Children" OR DE "Grandchildren" OR DE "Grandparents" OR DE "Illegitimate Children" OR DE "Inlaws" OR DE "Orphans" OR DE "Sons")                                     |
| S51 | (TI ((in OR common) N1 (law OR laws)) OR AB ((in OR common) N1 (law OR laws)))                                                                                                                                                                                                                                                        |
| S50 | (TI (grand*) OR AB (grand*))                                                                                                                                                                                                                                                                                                          |
| S49 | (TI (mother#) OR AB (mother#))                                                                                                                                                                                                                                                                                                        |
| S48 | DE "Mothers"                                                                                                                                                                                                                                                                                                                          |
| S47 | (TI (step-*) OR AB (step-*))                                                                                                                                                                                                                                                                                                          |
| S46 | (DE "Stepfamily" OR DE "Stepparents" OR DE "Stepchildren")                                                                                                                                                                                                                                                                            |
| S45 | DE "Family Relations"                                                                                                                                                                                                                                                                                                                 |
| S44 | DE "Interpersonal Interaction"                                                                                                                                                                                                                                                                                                        |
| S43 | (TI (family OR families OR familial) OR AB (family OR families OR familial))                                                                                                                                                                                                                                                          |
| S42 | DE "Family"                                                                                                                                                                                                                                                                                                                           |
| S41 | DE "Extended Family"                                                                                                                                                                                                                                                                                                                  |
| S40 | (TI (sibling*) OR AB (sibling*))                                                                                                                                                                                                                                                                                                      |
| S39 | DE "Siblings"                                                                                                                                                                                                                                                                                                                         |
| S38 | DE "Parents"                                                                                                                                                                                                                                                                                                                          |

S37 (TI (significant N1 other\*) OR AB (significant N1 other\*))  
 S36 DE "Significant Others"  
 S35 (TI (partner\*) OR AB (partner\*))  
 S34 (TI (wife OR wives) OR AB (wife OR wives))  
 S33 (TI (husband\*) OR AB (husband\*))  
 S32 (TI (spous\*) OR AB (spous\*))  
 S31 ((DE "Spouses" OR DE "Husbands" OR DE "Wives"))  
 S30 DE "Couples"  
 S29 (TI (married OR marriage\*) OR AB (married OR marriage\*))  
 S28 DE "Marriage"  
 S27 DE "Marital Relations"  
 S26 DE "Father Child Relations"  
 S25 (TI (father\*) OR AB (father\*))  
 S24 DE "Fathers" OR DE "Adolescent Fathers" OR DE "Single Fathers"  
 S23 DE "Expectant Fathers"  
 S22 S11 OR S12 OR S13 OR S14 OR S15 OR S16 OR S17 OR S18 OR S19 OR S20 OR S21  
 S21 TI "expectant mother\*" OR AB "expectant mother\*"  
 S20 TI (pregnant or pregnanc\*) OR AB (pregnant or pregnanc\*)  
 S19 DE "Breast Feeding"  
 S18 DE "Postnatal Period"  
 S17 DE "Prenatal Care" OR DE "Childbirth Training"  
 S16 DE "Perinatal Period"  
 S15 DE "Prenatal Diagnosis"  
 S14 DE "Prenatal Exposure"  
 S13 DE "Fetus"  
 S12 DE "Obstetrical Complications"  
 S11 DE "Pregnancy" OR DE "Adolescent Pregnancy"  
 S10 S5 OR S6 OR S7 OR S8 OR S9  
 S9 DE "Passive smoking"  
 S8 DE "Smokeless Tobacco"  
 S7 DE "Nicotine"  
 S6 DE "Smoking Cessation"  
 S5 DE "Tobacco Smoking"  
 S4 S1 OR S2 OR S3  
 S3 qualitative  
 S2 interview\* or (DE "Interviews") or (DE "Interviewing")  
 S1 findings

### Medline

Searched via EBSCO interface, 09.01.04

Limiters - Date of Publication: 19900101-20140131; English Language

| #   | Query                                                                                                                                                                                                      |
|-----|------------------------------------------------------------------------------------------------------------------------------------------------------------------------------------------------------------|
| S67 | S66                                                                                                                                                                                                        |
| S66 | S4 AND S14 AND S26 AND S65                                                                                                                                                                                 |
| S65 | S27 OR S28 OR S29 OR S30 OR S31 OR S32 OR S33 OR S34 OR S35 OR S36 OR S37 OR S38 OR S39 OR S40 OR S41 OR S42 OR S43 OR S44 OR S45 OR S46 OR S47 OR S48 OR S49 OR S50 OR S51 OR S52 OR S53 OR S54 OR S55 OR |

S56 OR S57 OR S58 OR S59 OR S60 OR S61 OR S62 OR S63 OR S64

S64 TI (acquaintance\*) OR AB (acquaintance\*)

S63 TI (friend\*) OR AB (friend\*)

S62 MH "Friends"

S61 TI (visitor\*) OR AB (visitor\*)

S60 TI (guest\*) OR AB (guest\*)

S59 TI (flatmate\* OR flat-mate\* OR co-renter\* OR corenter\*OR roommate OR roommates OR room-mate OR room-mates OR lodger\* OR tenant\* OR landlord\* OR land-lord\*) OR AB (flatmate\* OR flat-mate\* OR co-renter\* OR corenter\*OR roommate\* OR room-mate\* OR lodger\* OR tenant\* OR landlord\* OR land-lord\*)

S58 TI ((flat\* OR apartment\* OR room OR rooms OR house\* OR home\* OR accommodation) N1 shar\*) OR AB ((flat\* OR apartment\* OR room OR rooms OR house\* OR home\* OR accommodation) N1 shar\*)

S57 TI (cohabit\* OR co-habit\*) OR AB (cohabit\* OR co-habit\*)

S56 TI (household\*) OR AB (household\*)

S55 MH "Residence Characteristics"

S54 MH "Housing"

S53 TI (relative#) OR AB (relative#)

S52 TI (child OR children) OR AB (child OR children)

S51 TI (son OR sons OR daughter\*) OR AB (son OR sons OR daughter\*)

S50 TI ((in OR common) N1 (law OR laws)) OR AB ((in OR common) N1 (law OR laws))

S49 TI (grand\*) OR AB (grand\*)

S48 TI (mother#) OR AB (mother#)

S47 DE "Mothers"

S46 TI (step-\*) OR AB (step-\*)

S45 MH "Family Relations"

S44 MH "Interpersonal Relations"

S43 TI (family OR families OR familial) OR AB (family OR families OR familial)

S42 MH "Family"

S41 TI (sibling\*) OR AB (sibling\*)

S40 MH "Siblings"

S39 MH "Parents"

S38 TI (significant N1 other\*) OR AB (significant N1 other\*)

S37 TI (partner#) OR AB (partner#)

S36 TI (wife OR wives) OR AB (wife OR wives)

S35 TI (husband\*) OR AB (husband\*)

S34 TI (spous\*) OR AB (spous\*)

S33 MH "Spouses"

S32 TI (married OR marriage\*) OR AB (married OR marriage\*)

S31 MH "Marriage"

S30 MH "Paternal Behavior"

S29 MH "Father-Child Relations"

S28 TI (father\*) OR AB (father\*)

S27 MH "Fathers"

S26 S15 OR S16 OR S17 OR S18 OR S19 OR S20 OR S21 OR S22 OR S23 OR S24 OR S25

S25 TI "expectant mother\*" OR AB "expectant mother\*"

S24 MH "Pregnant Women"

S23 TI (pregnant or pregnanc\*) OR AB (pregnant or pregnanc\*)

S22 MH "Maternal Health Services+"

S21 MH "Breast Feeding"

S20 MH "Postpartum Period+"

S19 MH "Prenatal Care"

S18 MH "Perinatal Care"

S17 MH "Prenatal Diagnosis+"

S16 MH "Infant, Newborn"

S15 MH "Pregnancy+"

S14 S5 OR S6 OR S7 OR S8 OR S9 OR S10 OR S11 OR S12 OR S13

S13 MH "Tobacco Smoke Pollution"

S12 MH "Tobacco, Smokeless"

S11 MH "Nicotine"

S10 MH "Smoking Cessation"

S9 MH "Tobacco Use Cessation"

S8 MH "Tobacco Use Disorder"

S7 TI ((stop\* or quit\* or reduc\* or give up or giving up) N2 (cigarette\* or tobacco or smoking)) OR AB ((stop\* or quit\* or reduc\* or give up or giving up) N2 (cigarette\* or tobacco or smoking))

S6 MH "Tobacco"

S5 MH "Smoking"

S4 S1 OR S2 OR S3

S3 qualitative

S2 interview\* or MH "Interview"

S1 findings

## CINAHL

Searched via EBSCO interface, 09.01.14

Limiters - Published Date: 19900101-20140131; English Language

| #   | Query                                                                                                                                                                                                                                                                                                            |
|-----|------------------------------------------------------------------------------------------------------------------------------------------------------------------------------------------------------------------------------------------------------------------------------------------------------------------|
| S75 | S74                                                                                                                                                                                                                                                                                                              |
| S74 | S4 AND S11 AND S28 AND S73                                                                                                                                                                                                                                                                                       |
| S73 | S29 OR S30 OR S31 OR S32 OR S33 OR S34 OR S35 OR S36 OR S37 OR S38 OR S39 OR S40 OR S41 OR S42 OR S43 OR S44 OR S45 OR S46 OR S47 OR S48 OR S49 OR S50 OR S51 OR S52 OR S53 OR S54 OR S55 OR S56 OR S57 OR S58 OR S59 OR S60 OR S61 OR S62 OR S63 OR S64 OR S65 OR S66 OR S67 OR S68 OR S69 OR S70 OR S71 OR S72 |
| S72 | TI ((live OR living OR dwell* OR reside* OR stay* OR lodg* OR inhabit*) N1 together) OR AB (live OR living OR dwell* OR reside* OR stay* OR lodg* OR inhabit*) N1 together                                                                                                                                       |
| S71 | TI (common N1 abode*) OR AB (common N1 abode*)                                                                                                                                                                                                                                                                   |
| S70 | TI (acquaintance*) OR AB (acquaintance*)                                                                                                                                                                                                                                                                         |
| S69 | TI (friend*) OR AB (friend*)                                                                                                                                                                                                                                                                                     |
| S68 | TI (visitor*) OR AB (visitor*)                                                                                                                                                                                                                                                                                   |
| S67 | TI (guest*) OR AB (guest*)                                                                                                                                                                                                                                                                                       |
| S66 | TI (flatmate* OR flat-mate* OR co-renter* OR corenter* OR roommate OR roommates OR room-mate OR room-mates OR lodger* OR tenant* OR landlord* OR land-lord*) OR AB (flatmate* OR flat-mate* OR co-renter* OR corenter* OR roommate* OR room-mate* OR lodger* OR tenant* OR landlord* OR land-lord*)              |
| S65 | TI ((flat* OR apartment* OR room OR rooms OR house* OR home* OR accommodation) N1 shar*) OR AB ((flat* OR apartment* OR room OR rooms OR house* OR home* OR accommodation) N1 shar*)                                                                                                                             |
| S64 | TI (cohabit* OR co-habit*) OR AB (cohabit* OR co-habit*)                                                                                                                                                                                                                                                         |
| S63 | TI (relative OR relatives) OR AB (relative OR relatives)                                                                                                                                                                                                                                                         |
| S62 | TI (sibling*) OR AB (sibling*)                                                                                                                                                                                                                                                                                   |
| S61 | TI (child OR children*) OR AB (child OR children*)                                                                                                                                                                                                                                                               |
| S60 | TI (son OR sons OR daughter*) OR AB (son OR sons OR daughter*)                                                                                                                                                                                                                                                   |
| S59 | TI (family OR families OR familial) OR AB (family OR families OR familial)                                                                                                                                                                                                                                       |
| S58 | TI (household*) OR AB (household*)                                                                                                                                                                                                                                                                               |
| S57 | TI ((in OR common) N1 (law OR laws)) OR AB ((in OR common) N1 (law OR laws))                                                                                                                                                                                                                                     |
| S56 | TI (grand*) OR AB (grand*)                                                                                                                                                                                                                                                                                       |
| S55 | TI (step-*) OR AB (step-*)                                                                                                                                                                                                                                                                                       |
| S54 | TI (couple OR couples) OR AB (couple OR couples)                                                                                                                                                                                                                                                                 |
| S53 | TI (significant N1 other*) OR AB (significant N1 other*)                                                                                                                                                                                                                                                         |
| S52 | TI (married OR marriage*) OR AB (married OR marriage*)                                                                                                                                                                                                                                                           |
| S51 | TI (partner*) OR AB (partner*)                                                                                                                                                                                                                                                                                   |
| S50 | TI (wife OR wives) OR AB (wife OR wives)                                                                                                                                                                                                                                                                         |
| S49 | TI (husband*) OR AB (husband*)                                                                                                                                                                                                                                                                                   |
| S48 | TI (spous*) OR AB (spous*)                                                                                                                                                                                                                                                                                       |
| S47 | MH "Housing+"                                                                                                                                                                                                                                                                                                    |
| S46 | MH "Stepfamilies"                                                                                                                                                                                                                                                                                                |
| S45 | MH "Spouses"                                                                                                                                                                                                                                                                                                     |
| S44 | MH "Significant Other"                                                                                                                                                                                                                                                                                           |
| S43 | MH "Siblings"                                                                                                                                                                                                                                                                                                    |
| S42 | MH "Paternal Behavior"                                                                                                                                                                                                                                                                                           |
| S41 | MH "Parenting"                                                                                                                                                                                                                                                                                                   |
| S40 | MH "Men's Health"                                                                                                                                                                                                                                                                                                |
| S39 | MH "Marriage"                                                                                                                                                                                                                                                                                                    |
| S38 | MH "Interpersonal Relations+"                                                                                                                                                                                                                                                                                    |

S37 MH "Friendship"  
 S36 MH "Fathers+"  
 S35 MH "Father-Infant Relations"  
 S34 MH "Father-Child Relations"  
 S33 MH "Fatherhood"  
 S32 MH "Family+"  
 S31 MH "Extended Family+"  
 S30 TI (father\*) OR AB (father\*)  
 S29 MH "Expectant Fathers"  
 S28 S12 OR S13 OR S14 OR S15 OR S16 OR S17 OR S18 OR S19 OR S20 OR S21 OR S22 OR S23 OR S24 OR S25 OR S26  
 OR S27  
 S27 TI "expectant mother\*" OR AB "expectant mother\*"  
 S26 (MH "Expectant Mothers")  
 S25 TI (pregnant or pregnanc\*) OR AB (pregnant or pregnanc\*)  
 S24 (MH "Breast Feeding")  
 S23 (MH "Postnatal Period+")  
 S22 (MH "Infant, Newborn")  
 S21 (MH "Analgesia, Obstetrical")  
 S20 (MH "Labor Pain")  
 S19 (MH "Prenatal Care")  
 S18 (MH "Perinatal Care")  
 S17 (MH "Prenatal Diagnosis+")  
 S16 (MH "Fetal Monitoring+")  
 S15 (MH "Fetus+")  
 S14 (MH "Maternal Health Services+")  
 S13 (MH "Pregnancy Complications+")  
 S12 (MH "Pregnancy+")  
 S11 S5 OR S6 OR S7 OR S8 OR S9 OR S10  
 S10 (MH "Tobacco, Smokeless")  
 S9 (MH "Tobacco")  
 S8 (MH "Nicotine")  
 S7 (MH "Smoking Cessation Programs")  
 S6 (MH "Smoking")  
 S5 TI ((stop\* or quit\* or reduc\* or give up or giving up) N2 (cigarette\* or tobacco or smoking)) OR AB ((stop\* or quit\*  
 or reduc\* or give up or giving up) N2 (cigarette\* or tobacco or smoking))  
 S4 S1 OR S2 OR S3  
 S3 qualitative  
 S2 interview\* or (MH "Interviews+")  
 S1 findings

## Social Sciences Citation Index (SSCI)

Searched via Web of Knowledge interface, 09.01.14

Databases=SSCI, CCR-EXPANDED, IC Timespan=1990-2013; Language=(English)

- #20 #19 AND #3 AND #2 AND #1
- #19 #18 OR #17 OR #16 OR #15 OR #14 OR #13 OR #12 OR #11 OR #10 OR #9 OR #8 OR #7 OR #6 OR #5 OR #4
- #18 (TS=((live OR living OR dwell\* OR resid\* OR stay\* OR lodg\* OR inhabit\*) NEAR/1 (together))) AND Language=(English)
- #17 (TS=(guest\$ OR visitor\$ OR friend\$ OR acquaintance\$)) AND Language=(English)
- #16 (TS=(flatmate\$ OR flat-mate\$ OR co-renter\$ OR corenter\$ OR roommate\$ OR room-mate\$ OR lodger\$ OR tenant\$ OR landlord\$ OR land-lord\$)) AND Language=(English)
- #15 (TS=((flat\$ OR apartment\$ OR room\$ OR house\* OR home\$ OR accommodation) NEAR/1 ("same"))) AND Language=(English)
- #14 (TS=((flat\$ OR apartment\$ OR room\$ OR house\* OR home\$ OR accommodation) NEAR/1 (share\*))) AND Language=(English)
- #13 (TS=(co-habit\* OR cohabit\*)) AND Language=(English)
- #12 (TS=(family OR families OR familial)) AND Language=(English)
- #11 (TS=("significant other" OR "significant others")) AND Language=(English)
- #10 (TS=(married OR marriage\$)) AND Language=(English)
- #9 (TS=(partner\$)) AND Language=(English)
- #8 (TS=(couple\$)) AND Language=(English)
- #7 (TS=(husband\* OR wife OR wives)) AND Language=(English)
- #6 (TS=(spous\*)) AND Language=(English)
- #5 (TS=(paternal)) AND Language=(English)
- #4 (TS=(father\*)) AND Language=(English)
- #3 (TS=(pregnant or pregnanc\* or "expectant mother\*")) AND Language=(English)
- #2 (TS=(cigarette\* or tobacco or smok\* or nicotine)) AND Language=(English)
- #1 (TS=(qualitativ\* or finding\* or interview\*)) AND Language=(English)

## The Economic and Social Research Council (ESRC)

Searched via <http://www.esrc.ac.uk/search/advanced-search.aspx>, 09.01.14

(The ESRC website's advanced search engine is configured to use the Porter Stemming plugin which reduces search words down to their base word.)

| All of these words:              | AND | Any of these words:                       |
|----------------------------------|-----|-------------------------------------------|
| 1. qualitative pregnant          |     | cigarette tobacco smoker smoking nicotine |
| 2. interview pregnant            |     | cigarette tobacco smoker smoking nicotine |
| 3. finding pregnant              |     | cigarette tobacco smoker smoking nicotine |
| 4. qualitative pregnancy         |     | cigarette tobacco smoker smoking nicotine |
| 5. interview pregnancy           |     | cigarette tobacco smoker smoking nicotine |
| 6. finding pregnancy             |     | cigarette tobacco smoker smoking nicotine |
| 7. qualitative expectant         |     | cigarette tobacco smoker smoking nicotine |
| 8. interview expectant           |     | cigarette tobacco smoker smoking nicotine |
| 9. finding expectant             |     | cigarette tobacco smoker smoking nicotine |
| 10. qualitative <i>partner</i>   |     | cigarette tobacco smoker smoking nicotine |
| 11. interview <i>partner</i>     |     | cigarette tobacco smoker smoking nicotine |
| 12. finding <i>partner</i>       |     | cigarette tobacco smoker smoking nicotine |
| 13. qualitative <i>family</i>    |     | cigarette tobacco smoker smoking nicotine |
| 14. interview <i>family</i>      |     | cigarette tobacco smoker smoking nicotine |
| 15. finding <i>family</i>        |     | cigarette tobacco smoker smoking nicotine |
| 16. qualitative <i>household</i> |     | cigarette tobacco smoker smoking nicotine |
| 17. interview <i>household</i>   |     | cigarette tobacco smoker smoking nicotine |
| 18. finding <i>household</i>     |     | cigarette tobacco smoker smoking nicotine |
| 19. qualitative <i>friend</i>    |     | cigarette tobacco smoker smoking nicotine |
| 20. interview <i>friend</i>      |     | cigarette tobacco smoker smoking nicotine |
| 21. finding <i>friend</i>        |     | cigarette tobacco smoker smoking nicotine |

**PubMed (including Medline)**

Searched via NCBI interface, 10.01.14

Limited to Ahead of Print Citations and articles published in the last 2 months.

**Search Query**

- #7 #5 OR #6
- #6 #4 AND (2013/11:2014 [edat] OR 2013/11:2014 [crdt] OR 2013/11:2014[dp])
- #5 #4 AND pubstatusaheadofprint
- #4 #1 AND #2 AND #3
- #3 "Pregnant Women"[mesh] OR "Breast Feeding"[mesh] OR "Postpartum Period"[mesh] OR "Infant, Newborn"[mesh] OR "Obstetric Surgical Procedures"[mesh] OR "Analgesia, Obstetrical"[mesh] OR "Labor Pain"[mesh] OR "Prenatal Care"[mesh] OR "Perinatal Care"[mesh] OR "Prenatal Diagnosis"[mesh] OR "Fetal Therapies"[mesh] OR "Fetal Monitoring"[mesh] OR "Fetus"[mesh] OR "Maternal Health Services"[mesh] OR "Pregnancy Complications"[mesh] OR "Pregnancy"[mesh] OR pregnant[tiab] OR pregnanc\*[tiab] OR "expectant mother\*"[tiab]
- #2 "Tobacco Smoke Pollution"[mesh] OR "Tobacco, Smokeless"[mesh] OR "Tobacco"[mesh] OR "Nicotine"[mesh] OR "Tobacco Use Disorder"[mesh] OR "Tobacco Use Cessation"[mesh] OR "Smoking Cessation"[mesh] OR "Smoking"[mesh] OR ((stop\*[tiab] OR quit\*[tiab] OR reduce\*[tiab] OR reduct\*[tiab] OR "give up" [tiab] OR "giving up" [tiab]) AND (cigarette\*[tiab] OR tobacco[tiab] OR smoking[tiab]))
- #1 findings OR qualitative OR interview\* OR "Interviews as Topic"[mesh] OR "Interview, Psychological"[mesh]

**Google Scholar**

Searched via <http://scholar.google.co.uk>, 10.01.14

Limited to English language pages only and 2013-14 to capture 'ahead of print' but 'published online' articles excluding patents; cookies deleted between searches.

**All of these words:**

qualitative pregnant  
interview pregnancy  
qualitative "expectant"  
interview "expectant"

**This exact phrase:**

published online  
published online  
published online  
published online

**Any of these words:**

cigarette tobacco smoker smoking nicotine  
cigarette tobacco smoker smoking nicotine  
cigarette tobacco smoker smoking nicotine  
cigarette tobacco smoker smoking nicotine
